# Supplementary material for: Gβγ mediates activation of Rho guanine nucleotide exchange factor ARHGEF17 that promotes metastatic lung cancer progression
Source: PubMed Central journal article supplement (PMC8703085; doi:10.1016/j.jbc.2021.101440), 2021-11-20
Supplement: mmc1.pdf [file mmc1.pdf]

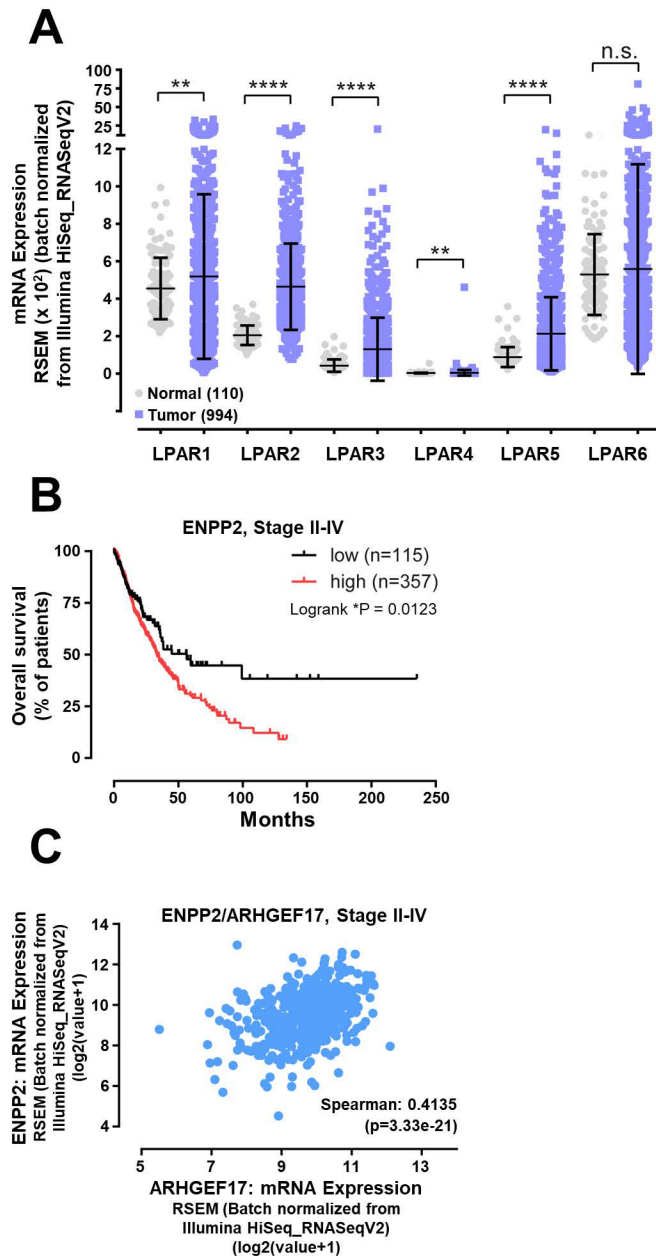

### Supplementary Figure 1.

A) Expression of LPA receptors (RNAseq) in NSCLC TCGA datasets analyzed at the cBioPortal platform. Graph represents mean±SEM; \*\* p<0.05, \*\*\*\* p<0.0001.

B) Maximally separated Kaplan-Meier plots represent overall survival of stage II-IV NSCLC patients with high and low ENPP2 expression.

C) ENPP2:ARHGEF17 expression in stage II-IV NSCLC TCGA patients. Coexpression was analyzed at the cBioPortal platform.

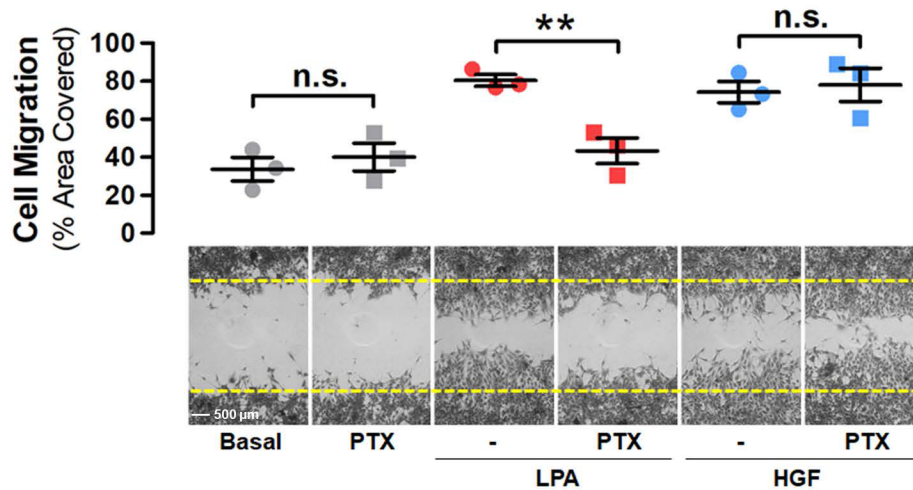

### Supplementary Figure 2.

LPA-induced LAP0297 cell migration was inhibited with persussis toxin (PTX), but HGF-induced migration was not. Before wound closure assays, cells were preincubated overnight with 100ng/mL PTX. Cell migration was stimulated with 5μM LPA or 10ng/mL HGF. Data represent 3 independent experiments, t-test.
